# Supplementary material
Source: PubMed Central journal article supplement (PMC5581687)
Supplement: NIHMS884072-supplement-2.pdf [file NIHMS884072-supplement-2.pdf]

|                      | Normal         | UC            | UC Neoplasia   |
|----------------------|----------------|---------------|----------------|
| N                    | 12             | 9             | 11             |
| Age (mean)           | 57.3           | 33.1          | 47             |
| Male/Female          | 6 (50%)/6(50%) | 5(56%)/4(44%) | 6 (55%)/5(45%) |
| Left/Right           | 8(67%)/4(33%)  | 6(67%)/3(33%) | 7(64%)/4(36%)  |
| UC Duration (median) | X              | 4             | 16             |
| UC Extent (Pan/Left) |                | 6(67%)/3(33%) | 9(81%)/2(18%)  |
| Medications          |                |               |                |
| 5-ASA                |                | 3             | 9              |
| Immunomodulator      |                | 6             | 2              |
| Anti-TNF             |                | 2             | 0              |
| Corticosteroids      |                | 3             | 4              |

**Supplementary Table 1.** Patient demographics and disease specific characteristics.
