# Supplementary material
Source: PubMed Central journal article supplement (PMC5581687)
Supplement: NIHMS884072-supplement-3.pdf [file NIHMS884072-supplement-3.pdf]

**Supplementary Table 2: Differentially Expressed miRNAs between UC and Normal (logFC >1, p<0.01)**

| miRNA           | logFC        | P.Value     |
|-----------------|--------------|-------------|
| hsa-miR-453     | 1.609104633  | 7.46E-06    |
| hsa-miR-495     | 1.129003031  | 9.79E-06    |
| hsa-miR-523     | 1.688587931  | 1.06E-05    |
| hsa-miR-2117    | 1.397141903  | 1.33E-05    |
| hsa-let-7i      | 1.062311924  | 2.63E-05    |
| hsa-miR-655     | 1.396576227  | 2.77E-05    |
| hsa-miR-379     | 1.200754437  | 2.87E-05    |
| hsa-let-7b      | 1.288387987  | 3.32E-05    |
| hsa-miR-429     | -1.503075466 | 3.38E-05    |
| hsa-miR-548d-3p | 1.174128377  | 4.37E-05    |
| hsa-miR-10b     | 1.141803744  | 4.49E-05    |
| hsa-miR-769-5p  | 1.068951179  | 5.39E-05    |
| hsa-miR-455-3p  | 1.692394626  | 7.35E-05    |
| hsa-miR-640     | -1.304075823 | 0.000118698 |
| hsa-miR-374a    | -1.892557122 | 0.000136622 |
| hsa-miR-141     | -1.696689205 | 0.000141004 |
| hsa-miR-551b    | 1.186538061  | 0.000142108 |
| hsa-miR-574-5p  | 1.298837452  | 0.00019671  |
| hsa-miR-130a    | -1.129578023 | 0.000255178 |
| hsa-miR-1283    | 1.323671212  | 0.000332696 |
| hsa-miR-133a    | -1.46091066  | 0.000334157 |
| hsa-miR-634     | 1.008225204  | 0.000351157 |
| hsa-miR-526b    | 1.026542593  | 0.000373333 |
| hsa-miR-139-5p  | -1.13383581  | 0.000447219 |
| hsa-miR-194     | -1.94469     | 0.000467991 |
| hsa-miR-615-5p  | 1.442700986  | 0.000538829 |
| hsa-miR-140-5p  | -1.281926115 | 0.00061734  |
| hsa-miR-374b    | -1.586888007 | 0.000647831 |
| hsa-miR-192     | -1.238186441 | 0.000769372 |
| hsa-miR-152     | -1.324692629 | 0.000785343 |
| hsa-miR-1974    | -2.120701108 | 0.000866272 |
| hsa-miR-193a-3p | 1.581331965  | 0.000918672 |
| hsa-miR-210     | -1.083063606 | 0.001306596 |
| hsa-miR-186     | -1.923468903 | 0.002024827 |
| hsa-miR-143     | -2.182572029 | 0.002906806 |
| hsa-miR-195     | -1.84841423  | 0.0036341   |
| hsa-miR-1178    | -1.637582872 | 0.003684522 |
| hsa-miR-1979    | -1.058132378 | 0.006892346 |
| hsa-miR-27a     | -1.326597092 | 0.007555973 |
