# Supplementary material
Source: PubMed Central journal article supplement (PMC5581687)
Supplement: NIHMS884072-supplement-4.pdf [file NIHMS884072-supplement-4.pdf]

**Supplementary Table 3: Differentially Expressed miRNAs between UCN and****Normal (logFC >1, p<0.01)**

| miRNA        | logFC     | P.Value     |
|--------------|-----------|-------------|
| hsa-miR-135b | 1.993930  | 3.93E-06    |
| hsa-miR-31   | 1.230806  | 1.17E-05    |
| hsa-miR-630  | 1.393800  | 0.001539477 |
| hsa-miR-221  | 1.057549  | 0.003026042 |
| hsa-miR-192  | -0.999632 | 0.005167974 |
| hsa-miR-100  | 1.009449  | 0.006701614 |
| hsa-miR-205  | 1.012858  | 0.008163684 |
| hsa-miR-21   | 1.076836  | 0.01670126  |
| hsa-miR-1    | -1.223197 | 0.019567378 |
| hsa-miR-1974 | 1.369156  | 0.030844863 |
