# Supplementary material
Source: PubMed Central journal article supplement (PMC5581687)
Supplement: NIHMS884072-supplement-5.pdf [file NIHMS884072-supplement-5.pdf]

**Supplementary Table 4: Differentially Expressed miRNAs between nUCaN and Normal (logFC>1, p<0.01)**

| miRNA          | logFC     | P.Value     |
|----------------|-----------|-------------|
| hsa-let-7i     | 1.117063  | 6.29E-05    |
| hsa-miR-145    | -1.408035 | 6.78E-05    |
| hsa-miR-365    | -1.405119 | 0.000252724 |
| hsa-miR-135b   | 1.110539  | 0.000275891 |
| hsa-miR-21     | 1.215813  | 0.002169029 |
| hsa-miR-100    | 1.247954  | 0.003763705 |
| hsa-miR-1178   | -1.584555 | 0.004570731 |
| hsa-miR-451    | 1.113799  | 0.006293279 |
| hsa-miR-1283   | 1.052422  | 0.010186695 |
| hsa-miR-532-3p | -1.109009 | 0.013438517 |
| hsa-miR-375    | -1.113357 | 0.014255754 |
