# Supplementary material
Source: PubMed Central journal article supplement (PMC5581687)
Supplement: NIHMS884072-supplement-6.pdf [file NIHMS884072-supplement-6.pdf]

**Supplementary Table 5: Differentially Expressed miRNAs between UCN and UC (logFC >1, p<0.01)**

| miRNA                 | logFC     | P.Value  |
|-----------------------|-----------|----------|
| hsa-miR-548a-3p       | -1.211429 | 3.04E-07 |
| hsa-miR-106b          | 1.86      | 1.88E-06 |
| hsa-miR-1974          | 3.488571  | 8.97E-06 |
| hsa-miR-453           | -1.76     | 1.73E-05 |
| hsa-miR-655           | -1.568571 | 2.46E-05 |
| hsa-miR-523           | -1.742857 | 2.78E-05 |
| hsa-miR-135b          | 2.141429  | 4.33E-05 |
| hsa-miR-584           | -1.262857 | 8.00E-05 |
| hsa-miR-769-5p        | -1.162857 | 9.67E-05 |
| hsa-miR-517c+hsa-mil- | -1.022857 | 1.08E-04 |
| hsa-miR-455-3p        | -1.465714 | 1.11E-04 |
| hsa-miR-634           | -1.33     | 1.20E-04 |
| hsa-miR-34a           | 2.115714  | 1.30E-04 |
| hsa-miR-615-5p        | -1.711429 | 1.33E-04 |
| hsa-miR-1291          | -1.192857 | 1.76E-04 |
| hsa-miR-548f          | -1.275714 | 1.82E-04 |
| hsa-miR-10b           | -1.378571 | 2.04E-04 |
| hsa-miR-379           | -1.164286 | 2.48E-04 |
| hsa-miR-331-3p        | 1.817143  | 2.74E-04 |
| hsa-miR-300           | -1.091429 | 3.01E-04 |
| hsa-miR-193a-3p       | -1.745714 | 3.68E-04 |
| hsa-miR-651           | -1.18     | 3.87E-04 |
| hsa-miR-495           | -1.141429 | 3.95E-04 |
| hsa-miR-1979          | 1.377143  | 4.26E-04 |
| hsa-miR-548d-3p       | -1.172857 | 4.42E-04 |
| hsa-miR-423-3p        | 1.704286  | 5.27E-04 |
| hsa-miR-216a          | 1.205714  | 6.44E-04 |
| hsa-miR-210           | 1.724286  | 6.71E-04 |
| hsa-miR-506           | -1.167143 | 7.14E-04 |
| hsa-miR-19a           | 1.347143  | 7.91E-04 |
| hsa-miR-1286          | -1.144286 | 8.24E-04 |
| hsa-miR-376c          | 1.468571  | 1.11E-03 |
| hsa-miR-551b          | -1.15     | 1.14E-03 |
| hsa-miR-381           | 1.428571  | 1.15E-03 |
| hsa-miR-31            | 1.391429  | 1.16E-03 |
| hsa-miR-566           | -1.052857 | 1.35E-03 |
| hsa-miR-490-3p        | 1.195714  | 1.38E-03 |
| hsa-miR-2117          | -1.064286 | 1.40E-03 |
| hsa-miR-151-3p        | 1.881429  | 1.58E-03 |

|                |           |          |
|----------------|-----------|----------|
| hsa-miR-374a   | 1.732857  | 1.63E-03 |
| hsa-miR-630    | 1.821429  | 1.67E-03 |
| hsa-miR-374b   | 1.81      | 1.74E-03 |
| hsa-miR-320b   | 1.205714  | 1.98E-03 |
| hsa-miR-526b   | -1.025714 | 2.18E-03 |
| hsa-miR-127-3p | 1.44      | 2.18E-03 |
| hsa-miR-1290   | 1.394286  | 2.30E-03 |
| hsa-miR-140-5p | 1.348571  | 2.36E-03 |
| hsa-miR-186    | 1.961429  | 2.39E-03 |
| hsa-miR-548g   | -1.361429 | 2.59E-03 |
| hsa-miR-296-5p | 1.134286  | 2.80E-03 |
| hsa-miR-520e   | 1.124286  | 3.38E-03 |
| hsa-miR-1250   | -1.128571 | 3.53E-03 |
| hsa-miR-205    | 1.362857  | 3.76E-03 |
| hsa-miR-130a   | 1.002857  | 4.34E-03 |
| hsa-miR-633    | 1.04      | 5.51E-03 |
| hsa-miR-151-5p | 1.238571  | 5.95E-03 |
| hsa-miR-221    | 1.027143  | 6.03E-03 |
| hsa-miR-152    | 1.29      | 7.22E-03 |
| hsa-miR-497    | 1.022857  | 7.47E-03 |
