# Supplementary material
Source: PubMed Central journal article supplement (PMC5581687)
Supplement: NIHMS884072-supplement-7.pdf [file NIHMS884072-supplement-7.pdf]

**Supplementary Table 6: Differentially Expressed miRNAs between  
nUCaN and UC (logFC >1, p<0.01)**

| miRNA           | logFC     | P.Value  |
|-----------------|-----------|----------|
| hsa-miR-617     | -1.144286 | 4.02E-05 |
| hsa-miR-769-5p  | -1.144286 | 1.18E-04 |
| hsa-miR-106b    | 1.321429  | 2.33E-04 |
| hsa-miR-34a     | 1.97      | 3.03E-04 |
| hsa-miR-634     | -1.185714 | 4.55E-04 |
| hsa-miR-1974    | 2.494286  | 6.40E-04 |
| hsa-miR-655     | -1.16     | 9.13E-04 |
| hsa-miR-1285    | -1.04     | 1.10E-03 |
| hsa-miR-1291    | -1.005714 | 1.11E-03 |
| hsa-miR-10a     | -1.267143 | 1.42E-03 |
| hsa-miR-718     | -1.07     | 1.62E-03 |
| hsa-miR-451     | 1.465714  | 3.14E-03 |
| hsa-miR-381     | 1.257143  | 3.58E-03 |
| hsa-miR-497     | 1.112857  | 3.96E-03 |
| hsa-miR-376c    | 1.235714  | 4.96E-03 |
| hsa-miR-193a-3p | -1.284286 | 6.10E-03 |
| hsa-miR-453     | -1.005714 | 6.72E-03 |
| hsa-miR-31      | 1.092857  | 8.44E-03 |
